# Supplementary material for: Construction of solvent-dependent self-assembled porous Ni(ii)-coordinated frameworks as effective catalysts for chemical transformation of CO2
Source: Royal Society of Chemistry journal article supplement (doi:10.1039/c6ra22971a), 2016-01-01

## Supporting Information

### **Construction of Solvent-dependent Self-assembly Porous Ni(II) Coordinated Frameworks Effectively Catalysis for Chemical Transformation of CO<sub>2</sub>**

Zhen Zhou,<sup>a</sup> Lu Yang,<sup>a</sup> Yefei Wang,<sup>a</sup> Cheng He,<sup>\*a</sup> Tao Liu<sup>a</sup> and Chunying Duan<sup>ab</sup>

<sup>a</sup>*State Key Laboratory of Fine Chemicals, Dalian University of Technology, Dalian 116024, China;* <sup>b</sup>*Collaborative Innovation Center of Chemical Science and Engineering, Tianjin, 300071, China.*

#### **Contents**

- 1. Crystallography Data.**
- 2. Supplementary Structural Figures.**
- 3. Characterizations of Catalysts.**
- 4. Catalysis Details**

## 1. Crystallography data.

**Table S1.** Crystal data and structure refinements

| Compounds                                          | Ni-1                                                                | Ni-2                                                                     |
|----------------------------------------------------|---------------------------------------------------------------------|--------------------------------------------------------------------------|
| Empirical formula                                  | C <sub>15</sub> H <sub>8</sub> Ni <sub>0.75</sub> O <sub>6.75</sub> | C <sub>3.75</sub> H <sub>2.25</sub> Ni <sub>0.25</sub> O <sub>1.34</sub> |
| Formula weight                                     | 340.25                                                              | 83.45                                                                    |
| <i>T</i> /K                                        | 220(2)                                                              | 220(2)                                                                   |
| Crystal system                                     | Orthorhombic                                                        | Trigonal                                                                 |
| Space group                                        | <i>Pmna</i>                                                         | <i>P6/mmm</i>                                                            |
| <i>a</i> /Å                                        | 27.2662(6)                                                          | 26.2500(4)                                                               |
| <i>b</i> /Å                                        | 11.5396(3)                                                          | 26.2500(4)                                                               |
| <i>c</i> /Å                                        | 13.9678(3)                                                          | 11.2436(5)                                                               |
| $\alpha$ <sup>o</sup>                              | 90                                                                  | 90                                                                       |
| $\beta$ <sup>o</sup>                               | 90                                                                  | 90                                                                       |
| $\gamma$ <sup>o</sup>                              | 90                                                                  | 120                                                                      |
| <i>V</i> /Å <sup>3</sup>                           | 4394.84(18)                                                         | 6709.6(3)                                                                |
| <i>Z</i>                                           | 8                                                                   | 24                                                                       |
| <i>D</i> <sub>calc</sub> /Mg m <sup>-3</sup>       | 1.028                                                               | 0.496                                                                    |
| $\mu$ /mm <sup>-1</sup>                            | 0.696                                                               | 0.440                                                                    |
| <i>F</i> (000)                                     | 1384                                                                | 1020                                                                     |
| <i>R</i> <sub>int</sub>                            | 0.0317                                                              | 0.0717                                                                   |
| Data/parameters                                    | 3973 / 257                                                          | 2312 / 80                                                                |
| GOF                                                | 1.147                                                               | 1.047                                                                    |
| <i>R</i> [ <i>I</i> > 2σ( <i>I</i> )] <sup>a</sup> | <i>R</i> <sub>1</sub> = 0.0921<br><i>wR</i> <sub>2</sub> = 0.2896   | <i>R</i> <sub>1</sub> = 0.0983<br><i>wR</i> <sub>2</sub> = 0.3269        |
| <i>R</i> indices (all data) <sup>b</sup>           | <i>R</i> <sub>1</sub> = 0.1003<br><i>wR</i> <sub>2</sub> = 0.2963   | <i>R</i> <sub>1</sub> = 0.1140<br><i>wR</i> <sub>2</sub> = 0.3359        |
| $\Delta\rho_{\max,\min}$ /eÅ <sup>-3</sup>         | 1.319 / -0.836                                                      | 1.041 / -0.578                                                           |
| CCDC number                                        | 1502000                                                             | 1502001                                                                  |

$$^a R_1 = \Sigma||F_o| - |F_c||/\Sigma|F_o|; \quad ^b wR_2 = \Sigma[w(F_o^2 - F_c^2)^2]/\Sigma[w(F_o^2)^2]^{1/2}$$

## 2. Supplementary Structural Figures

**Figure S1.** The ball-stick mode of the 3D structural framework (a) and the topological net (b) of **Ni-1** along the *b* axis. All guest molecules and hydrogen atoms were omitted for clarity.

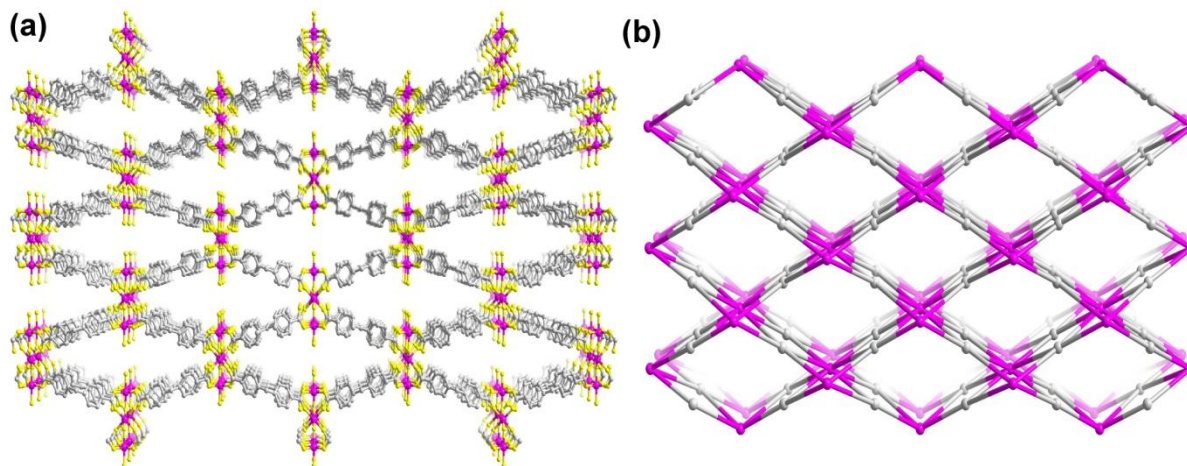

**Figure S2.** The ball-stick mode of the 3D structural framework (a) and the topological net (b) of **Ni-1** along the *c* axis. All guest molecules and hydrogen atoms were omitted for clarity.

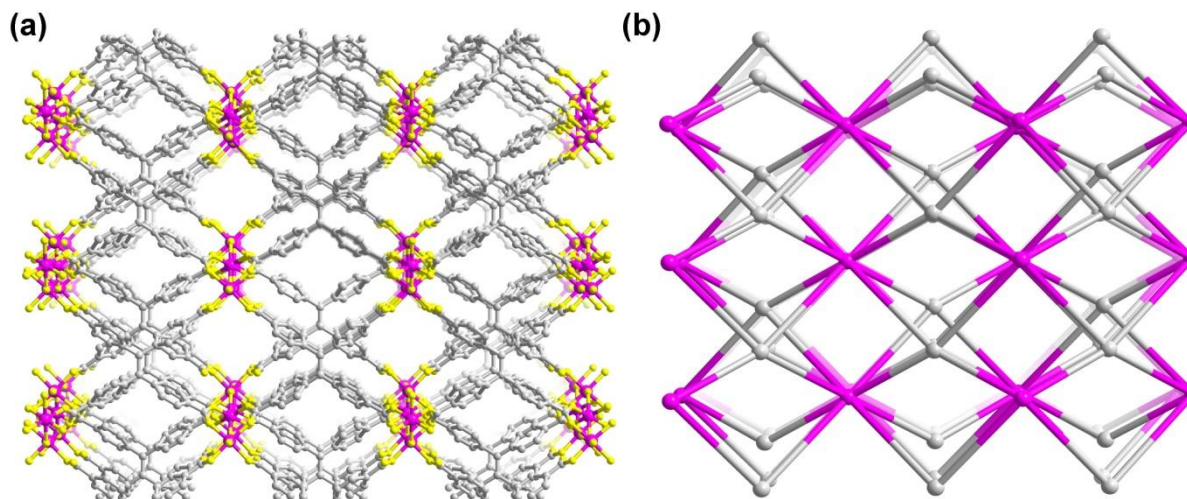

**Figure S3.** The ball-stick mode of the 3D structural framework (a) and the topological net (b) of Ni-2 along the *c* axis. All guest molecules and hydrogen atoms were omitted for clarity.

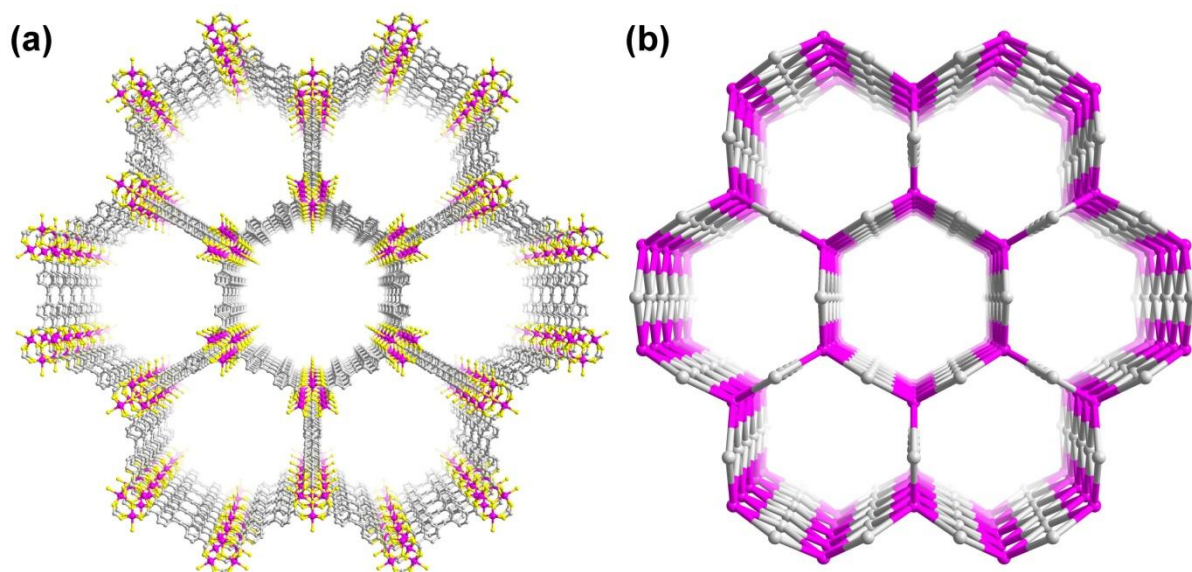

**Figure S4.** The ball-stick mode of the 3D structural framework (a) and the topological net (b) of Ni-2 along the *b* axis. All guest molecules and hydrogen atoms were omitted for clarity.

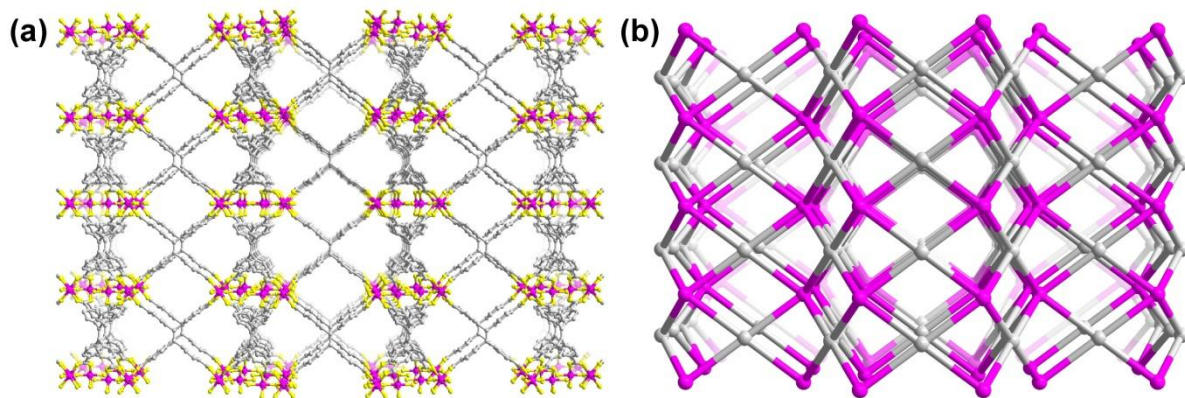

### 3. Characterizations of Catalysts

**Figure S5.** TG curve of as-synthesized Ni-1 (black) and activated Ni-1 (red).

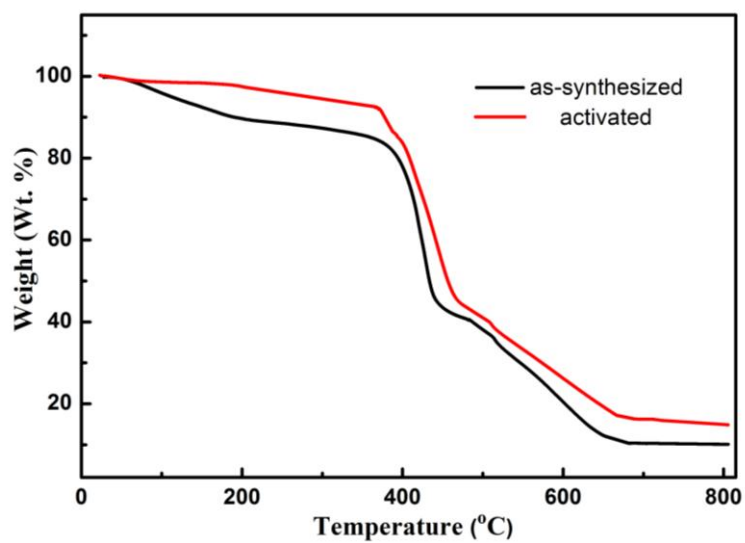

**Figure S6.** TG curve of as-synthesized Ni-2 (black) and activated Ni-2 (red)..

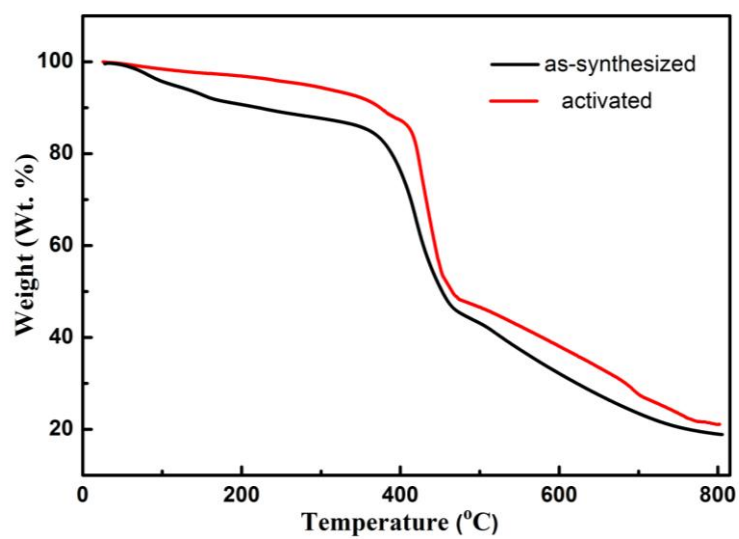

**Figure S7.** IR spectra of Ni-1 and the samples after being dispersed in different solvents.

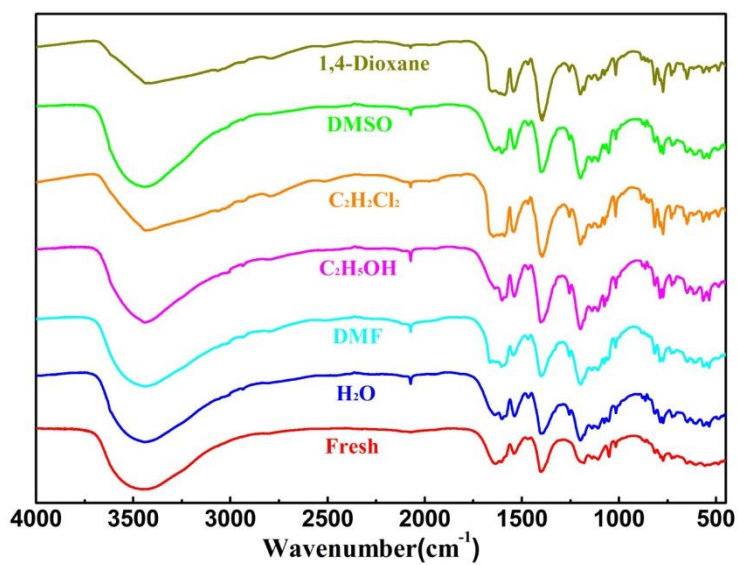

**Figure S8.** IR comparison between Ni-2 and the samples after being dispersed in different solvents.

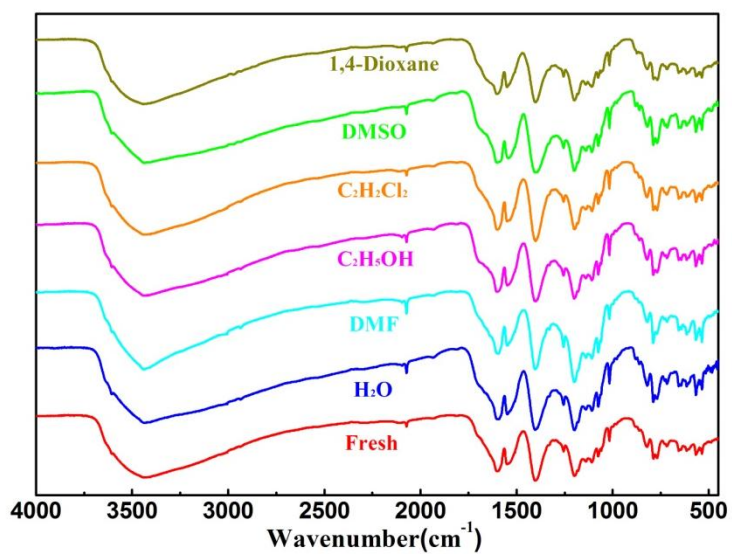

**Figure S9.** PXRD patterns of Ni-1 (blue), its simulated pattern based on the single-crystal data (red) and the recycled catalyst after reactions (green).

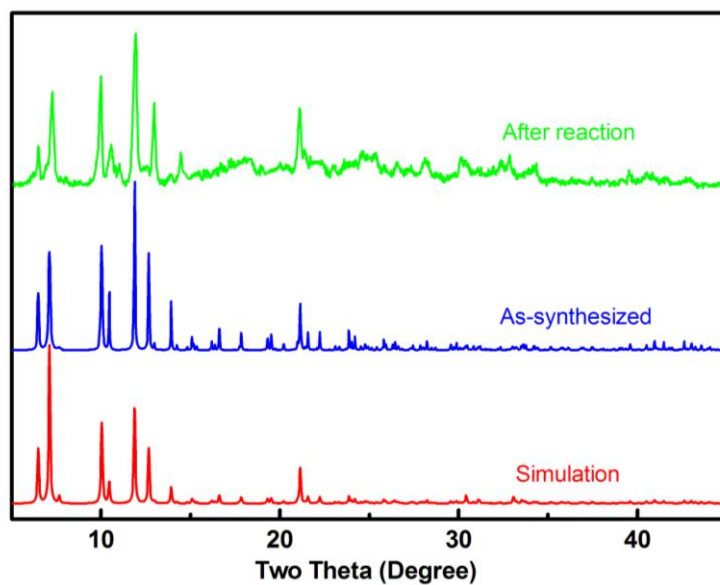

**Figure S10.** PXRD patterns of Ni-2 (blue), its simulated pattern based on the single-crystal data (red) and the recycled catalyst after reactions (green).

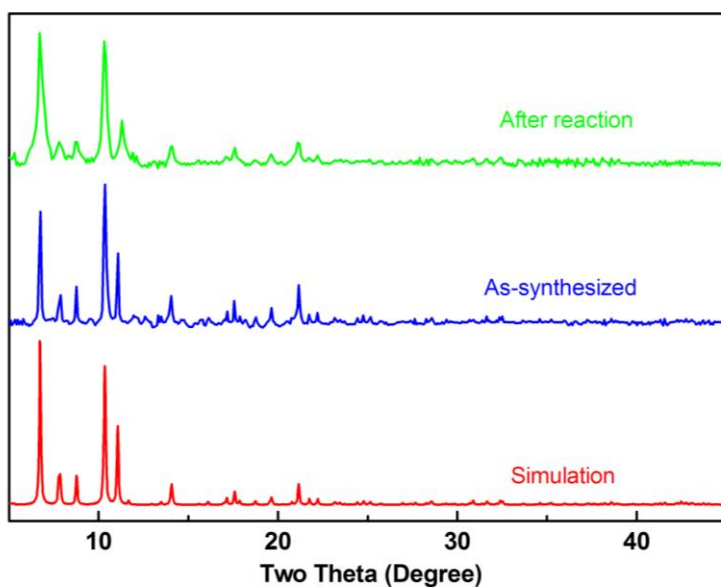

#### 4. Catalysis Details

**Table S2.** Recyclability characterization of Ni-1 and Ni-2 in five runs for CO<sub>2</sub> cycloaddition with propylene oxide to produce propylene carbonate under the optimal conditions.

| Entry   | Yield (%) |      |
|---------|-----------|------|
|         | Ni-1      | Ni-2 |
| Round 1 | 98        | 99   |
| Round 2 | 97        | 99   |
| Round 3 | 95        | 96   |
| Round 4 | 95        | 93   |
| Round 5 | 91        | 92   |

**Table S3.** Molecular Size of epoxides.<sup>[a]</sup>

| Entry | Substrate                                                                           | 3D view                                                                             | x (Å) | y (Å) | z (Å) |
|-------|-------------------------------------------------------------------------------------|-------------------------------------------------------------------------------------|-------|-------|-------|
| 1     |  |  | 4.2   | 2.6   | 1.8   |
| 2     |  |  | 6.6   | 4.3   | 2.3   |
| 3     |  |  | 8.7   | 3.0   | 2.3   |
| 4     |  |  | 9.9   | 2.5   | 3.0   |
| 5     |  |  | 9.4   | 4.3   | 2.3   |
| 6     |  |  | 15.4  | 9.4   | 9.0   |

[a] The assumed structures and the molecular size were calculated by using the program Chem3D



**Scheme S1.** Proposed reaction mechanism for cycloaddition reactions from CO<sub>2</sub> and epoxides catalyzed by Ni-based MOF materials.

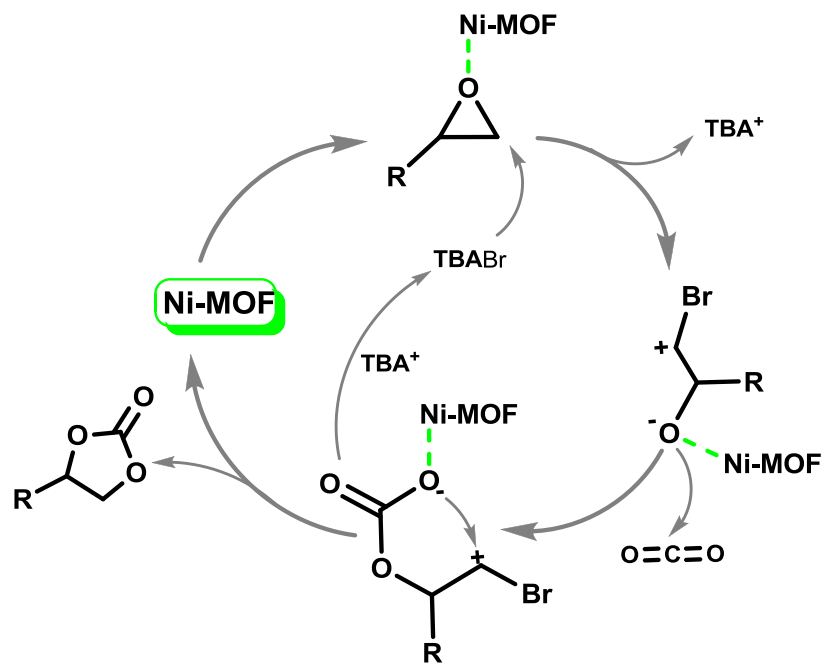

**Figure S11.**  $^1\text{H}$  NMR spectra of 2a (400 MHz,  $\text{CDCl}_3$ ):  $\delta = 4.99\text{--}4.86$  (1H, m), 4.63 (1H, t,  $J$  8.1), 4.06 (1H, t,  $J$  7.8), 1.51 (3H, d,  $J$  6.2). Isolated yield: 94.6% (**Ni-1**), 96.5% (**Ni-2**).

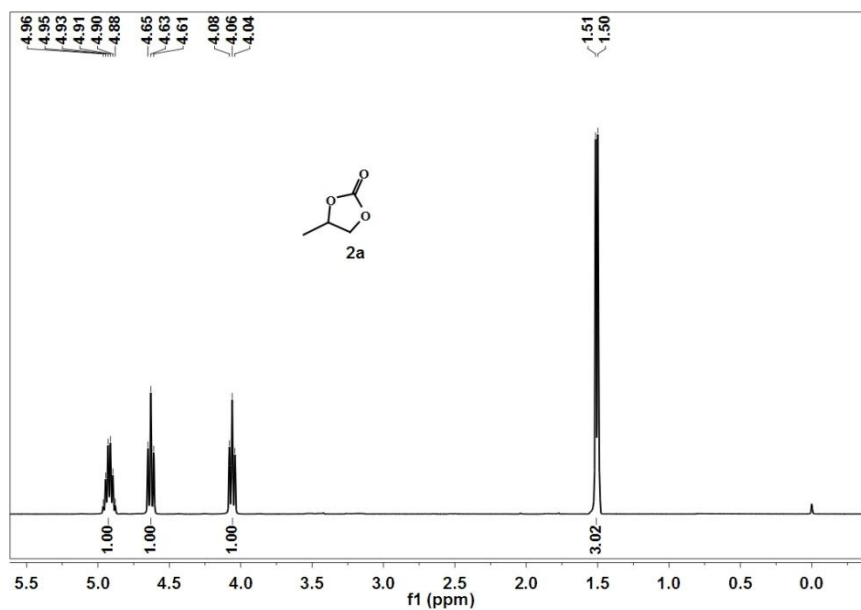

**Figure S12.**  $^1\text{H}$  NMR spectra of 2b (400 MHz,  $\text{CDCl}_3$ ):  $\delta = 7.46\text{--}7.36$  (3H, m), 7.34 (2H, dd,  $J$  7.4, 2.1), 5.66 (1H, t,  $J$  8.0), 4.78 (1H, t,  $J$  8.4), 4.32 (1H, dd,  $J$  8.6, 7.9). Isolated yield: 65.3% (**Ni-1**), 67.7% (**Ni-2**).

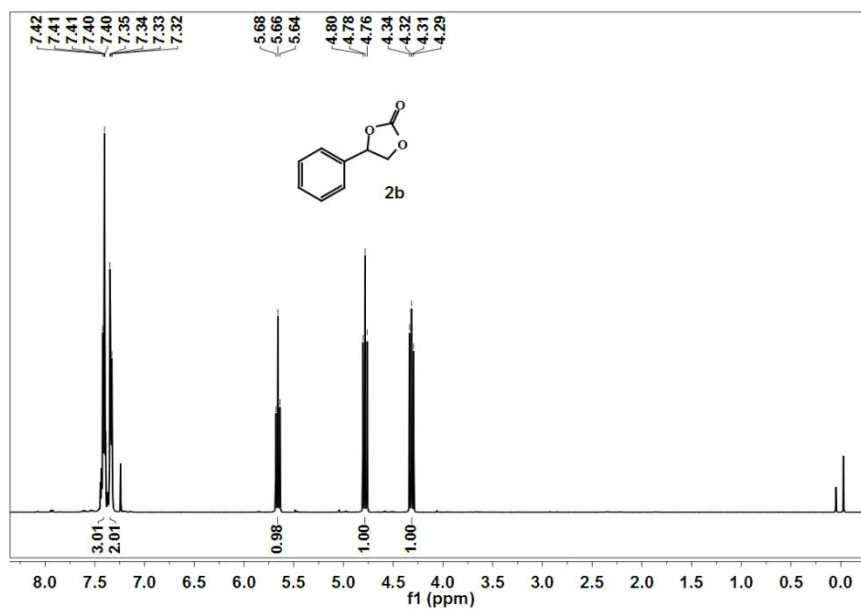

**Figure S13.**  $^1\text{H}$  NMR spectra of **2c** (400 MHz,  $\text{CDCl}_3$ ):  $\delta = 5.94\text{--}5.75$  (1H, m),  $4.86\text{--}4.72$  (1H, m),  $4.51\text{--}4.35$  (2H, m),  $4.07\text{--}3.96$  (2H, m),  $3.69\text{--}3.55$  (2H, m). The peak at 5.30 ppm refers to the  $\text{CH}_2\text{Cl}_2$ . Isolated yield: 95.2% (**Ni-1**), 94.3% (**Ni-2**).

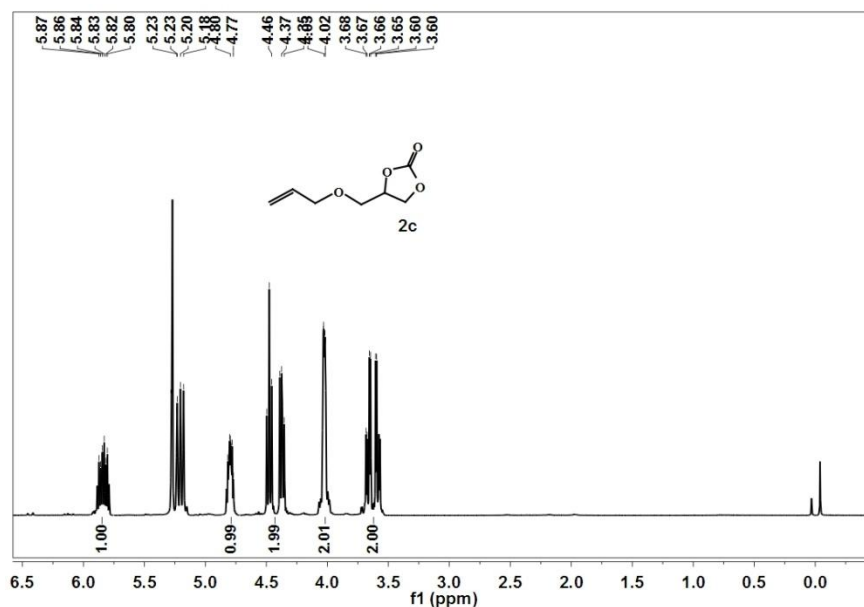

**Figure S14.**  $^1\text{H}$  NMR spectra of **2d** (400 MHz,  $\text{CDCl}_3$ ):  $\delta = 4.81$  (1H, td,  $J$  9.6, 3.8),  $4.55\text{--}4.36$  (2 H, m),  $3.64$  (2 H, ddd,  $J$  27.3, 11.0, 3.8),  $3.51$  (2H, t,  $J$  6.5),  $1.59\text{--}1.53$  (2H, m),  $1.36$  (2 H, dd,  $J$  14.9, 7.4),  $0.92$  (3H, t,  $J$  7.4). Isolated yield: 86.3% (**Ni-1**), 88.5% (**Ni-2**).

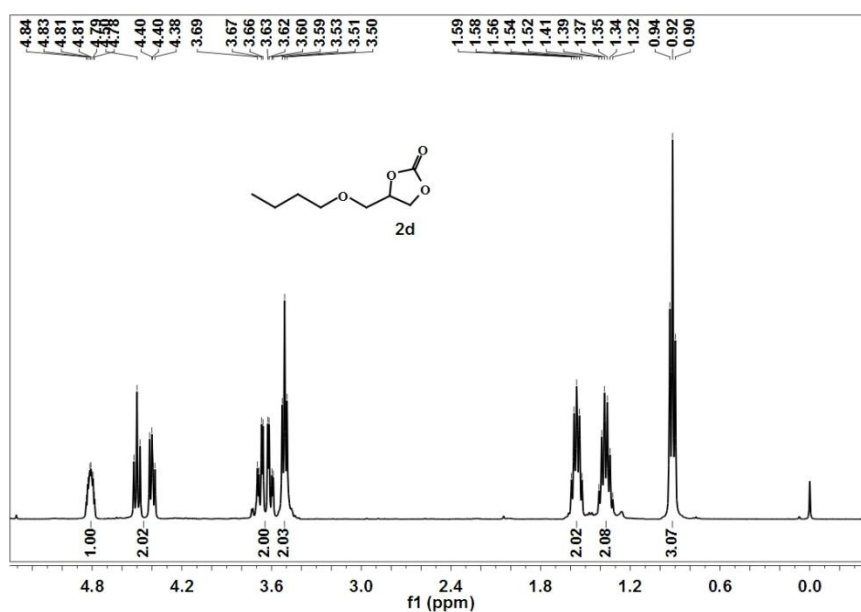

**Figure S15.**  $^1\text{H}$  NMR spectra of **2e** (400 MHz,  $\text{CDCl}_3$ ):  $\delta = 7.36\text{--}7.24$  (2H, m),  $7.11\text{--}6.75$  (3H, m), 5.02 (1H, ddd,  $J$  8.4, 4.2, 1.9), 4.65–4.48 (2H, m), 4.18 (2H, ddd,  $J$  36.0, 10.5, 3.9). The peak at 5.30 ppm refers to the  $\text{CH}_2\text{Cl}_2$ . Isolated yield: 81.6% (**Ni-1**), 82.4% (**Ni-2**).

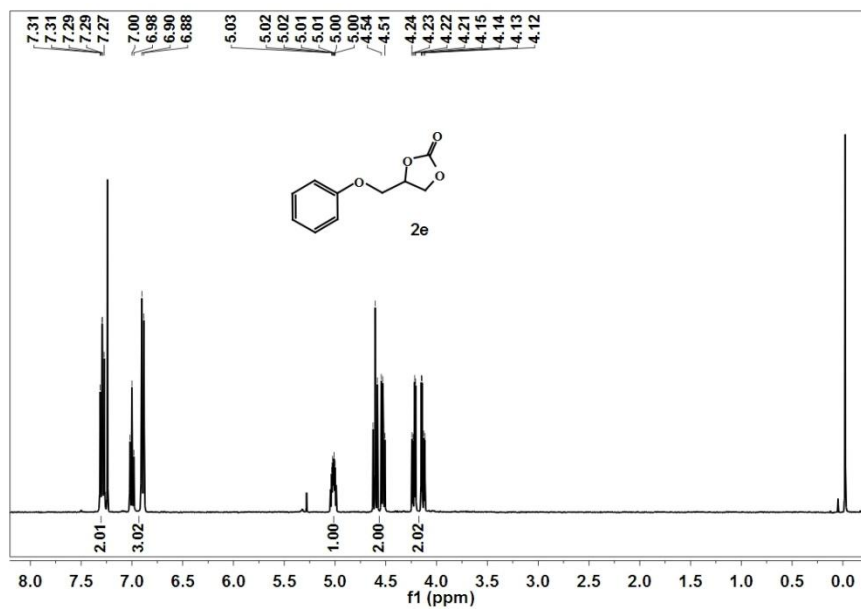

Supplement: c6ra22971a1.pdf [file c6ra22971a1.pdf]
